# Supplementary material for: Dual recognition of H3K4me3 and H3K27me3 by a plant histone reader SHL
Source: PubMed Central journal article supplement (PMC6013494; doi:10.1038/s41467-018-04836-y), 2018-06-21
Supplement: 41467_2018_4836_MOESM1_ESM.pdf [file 41467_2018_4836_MOESM1_ESM.pdf]

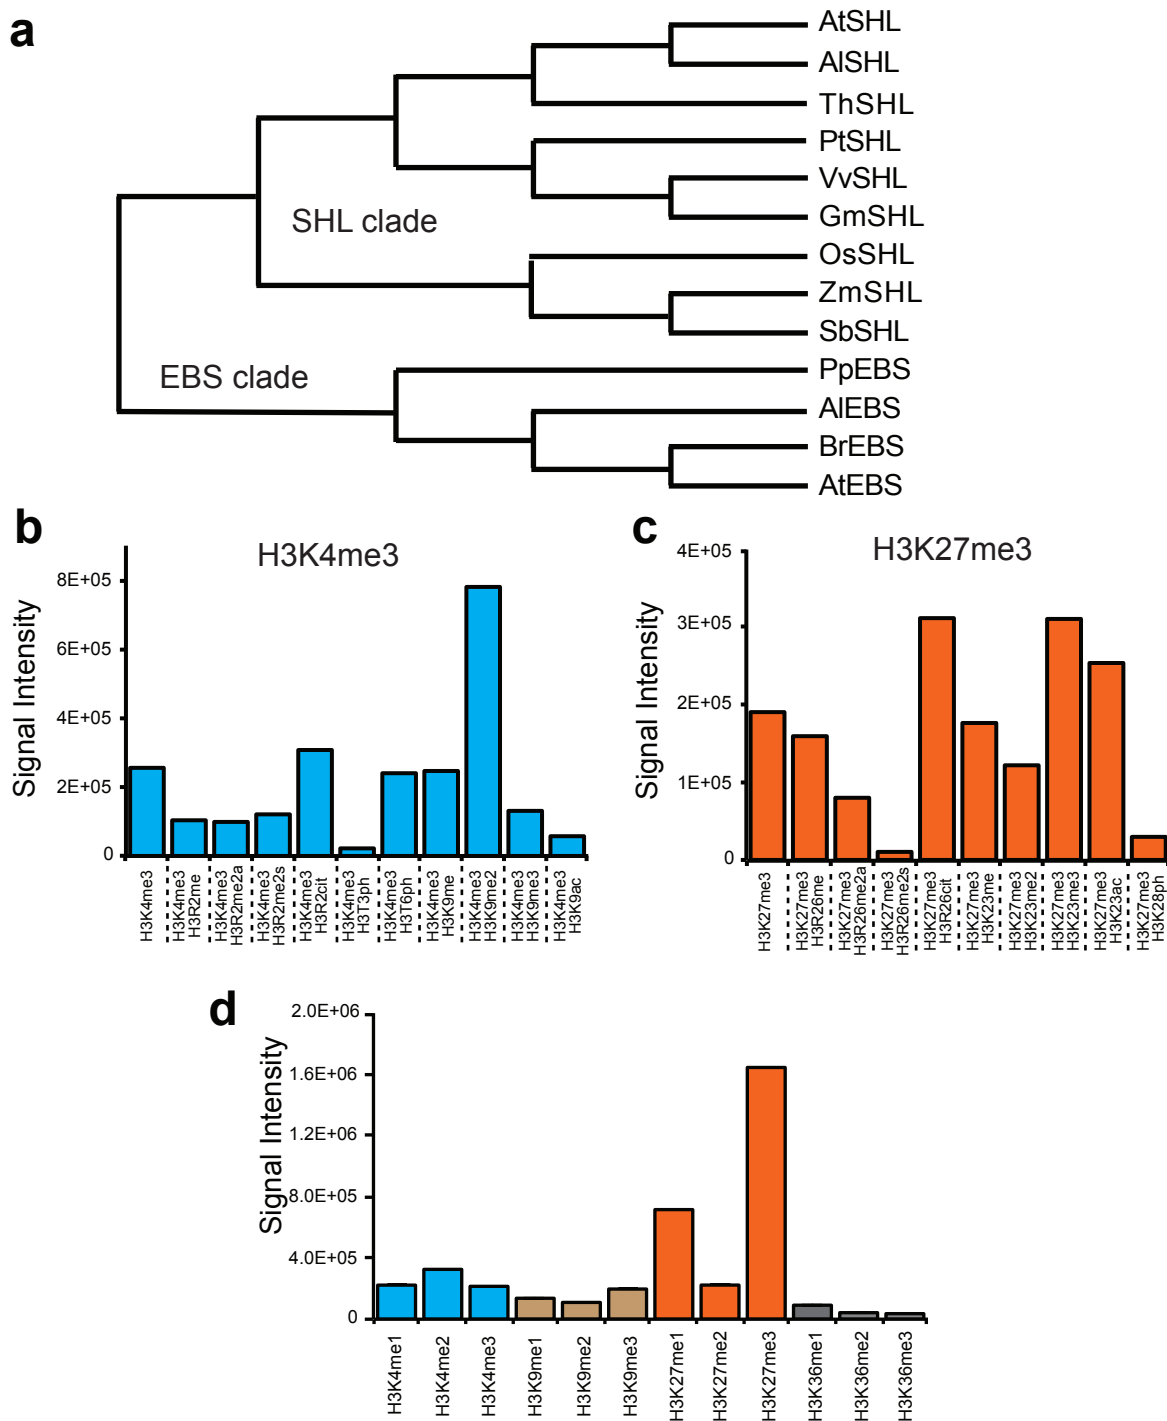

**Supplementary Fig. 1** SHL recognizes methylated H3K4 and H3K27 marks. **a** A phylogenetic tree of the SHL and EBS related proteins show that SHL and EBS form independent clade. *Arabidopsis thaliana* (At), *A. lyrata* (Al), *Theilingiella halophila* (Th), *Populus trichocarpa* (Pt), *Vitis vinifera* (Vv), *Glycine max* (Gm), *Oryza sativa* (Os), *Zea mays* (Zm), and *Sorghum bicolor* (Sb). *Physcomitrella patens* (Pp), *Brassica sp* (Br). **b,c** Relative intensity of selective H3K4me3-containing (b) and H3K27me3-containing (d) peptide species. Relative signal intensity is calculated by normalizing each mean signal intensity at 635 nm of triplicate spots to the highest signal on individual subarray, after subtracting background signals (derived from empty spots) for all spots. **d** Relative intensity of SHL binding with different peptides. Peptide species containing same PTMs are grouped together.

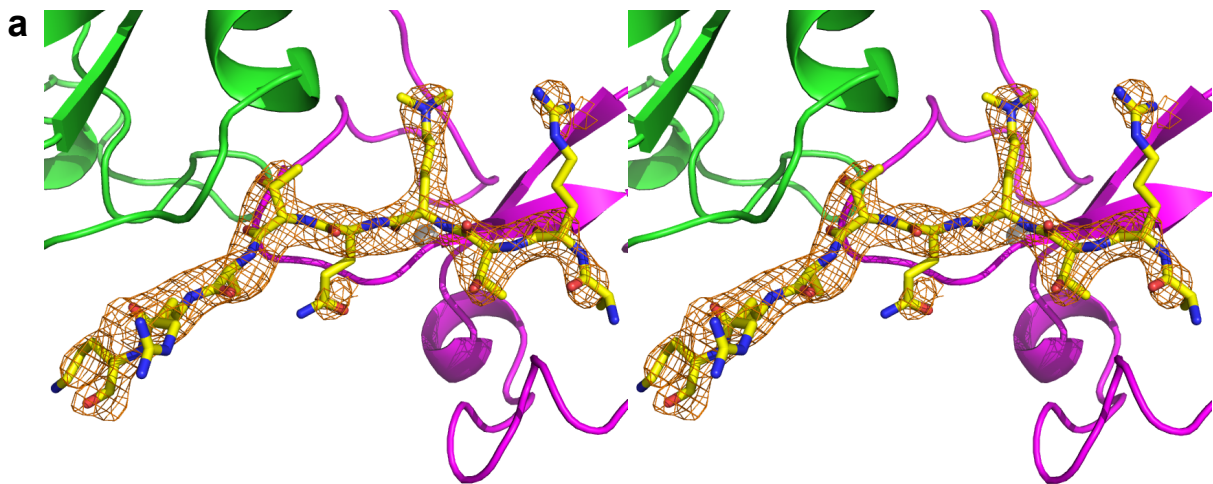

A stereo view of the 2Fo-Fc map of the H3K4me3 peptide

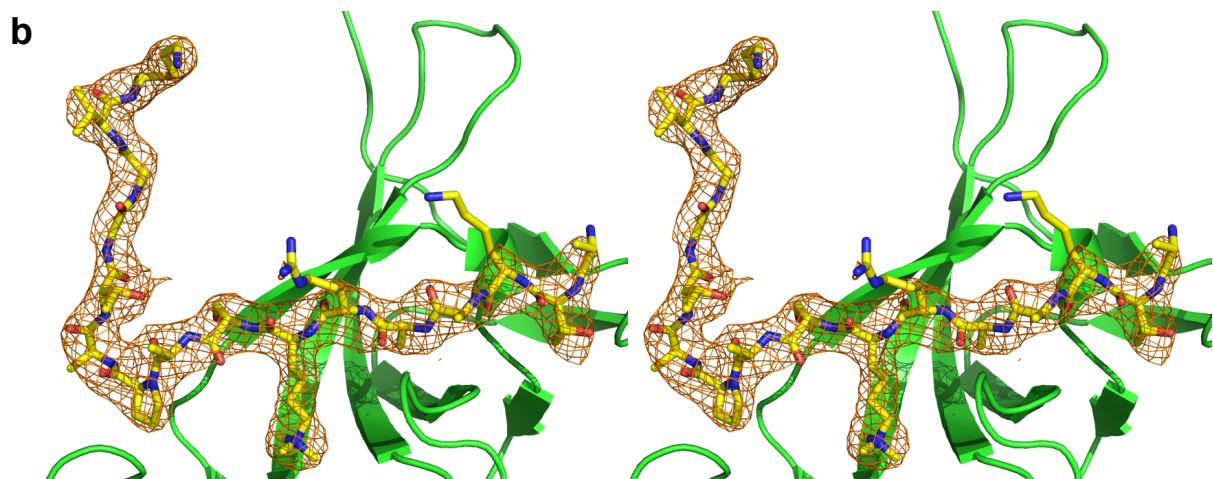

A stereo view of the 2Fo-Fc map of the H3K27me3 peptide

**Supplementary Fig. 2** Electron density maps of the peptides. **a** A stereo view of the SIGMAA weighted 2Fo-Fc map of the H3K4me3 peptide at 1  $\sigma$  level. **b** A stereo view of the SIGMAA weighted 2Fo-Fc map of the H3K27me3 peptide at 1  $\sigma$  level.

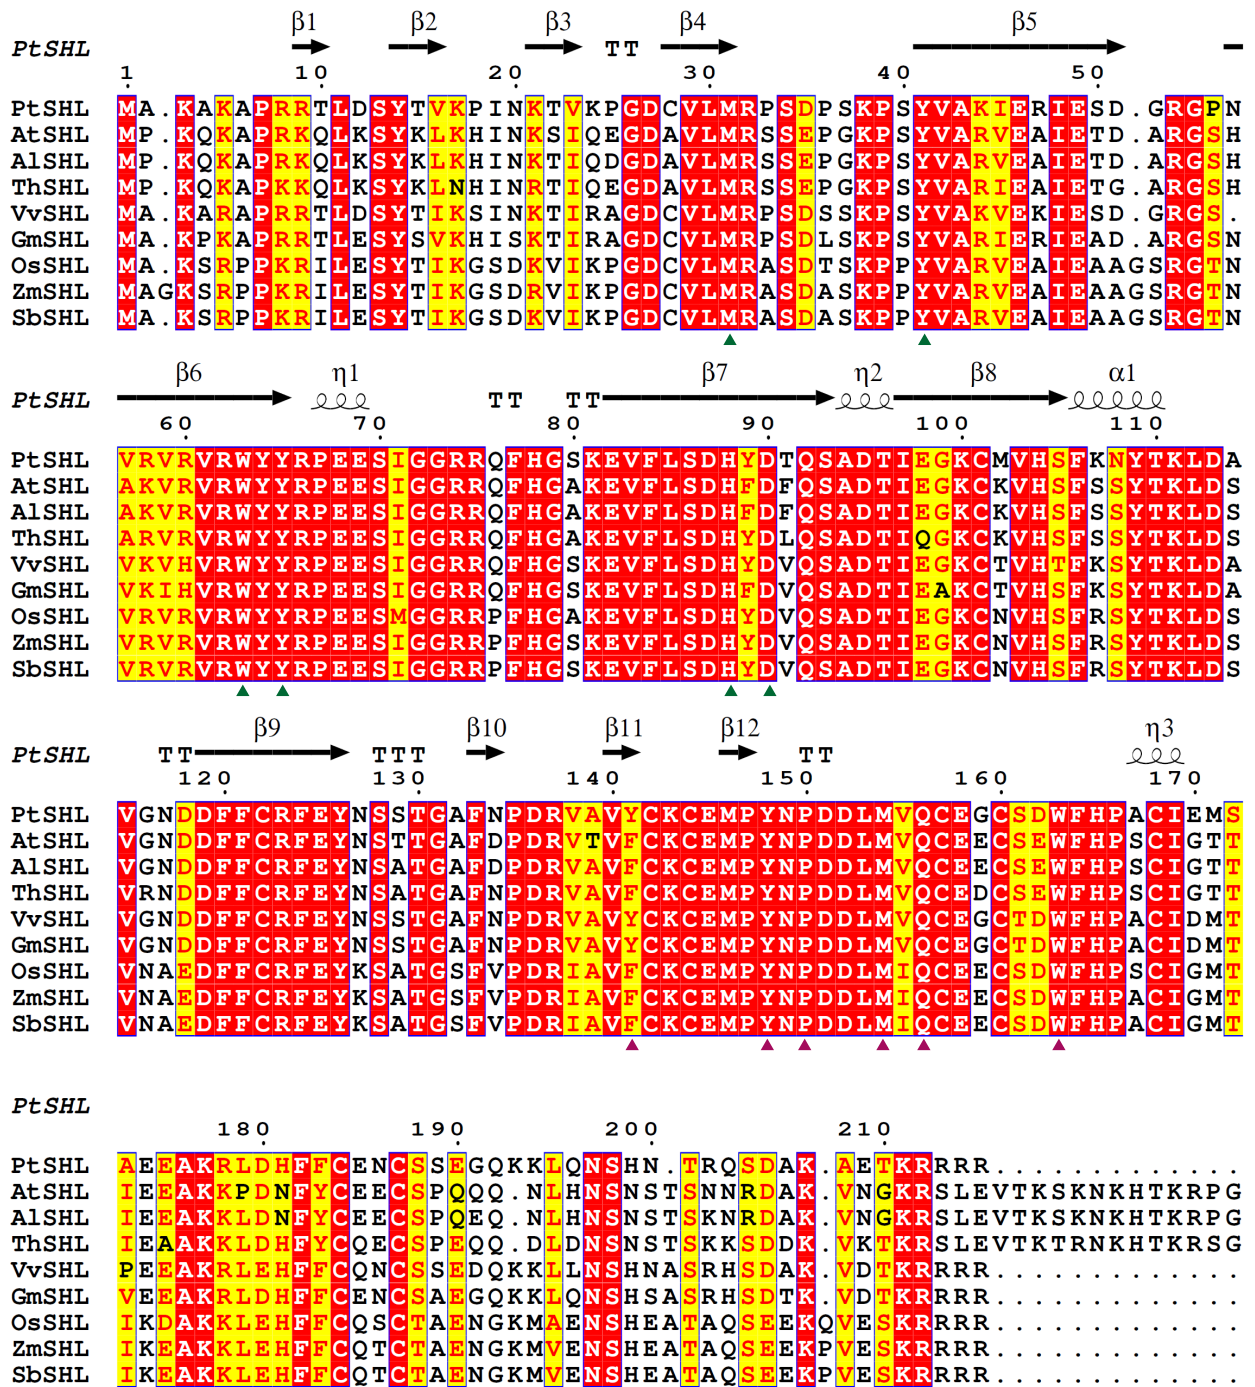

**Supplementary Fig. 3** SHL proteins are highly conserved in plants. Sequence alignment of SHL proteins from *Populus trichocarpa* (Pt), *Arabidopsis thaliana* (At), *A. lyrata* (Al), *Thellungiella halophila* (Th), *Vitis vinifera* (Vv), *Glycine max* (Gm), *Oryza sativa* (Os), *Zea mays* (Zm), and *Sorghum bicolor* (Sb). The secondary structures of PtSHL are highlighted on the top of the alignment. The residues involving in H3K27me3-binding and H3K4me3-binding are marked by green and magenta triangles, respectively. All the critical H3K27me3- or H3K4me3-binding residues are conserved.

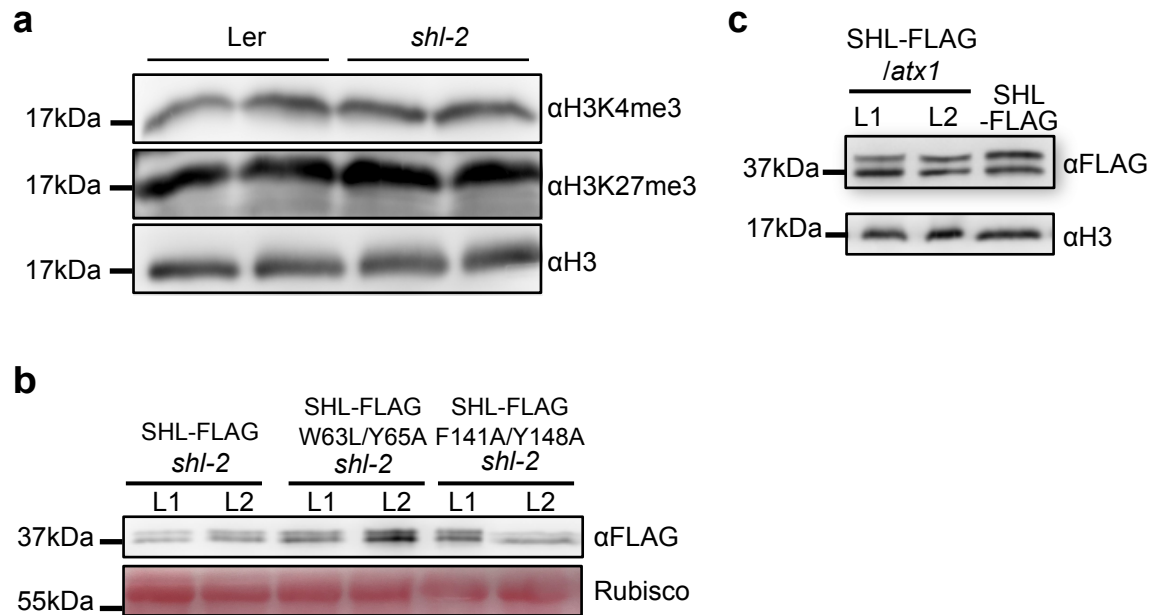

**Supplementary Fig. 4** Functional analyses of SHL protein. **a** Western blot analysis of H3K4me3 and H3K27me3 levels in Ler and *shl-2* mutant. H3 serves as a loading control. **b** Western blot analysis of SHL protein levels in *atx1* mutant background using an anti-FLAG antibody. H3 serves as a loading control. **c** Western blot analysis showing SHL protein levels from transgenic plants expressing wild-type SHL-FLAG, H3K27me3 binding defective mutant SHL-FLAG W63L/Y65A, and H3K4me3 binding defective mutant SHL-FLAG F141A/Y148A using an anti-FLAG antibody. Rubisco serves as a loading control. Two independent transgenic lines for each transgene are shown as L1 and L2.

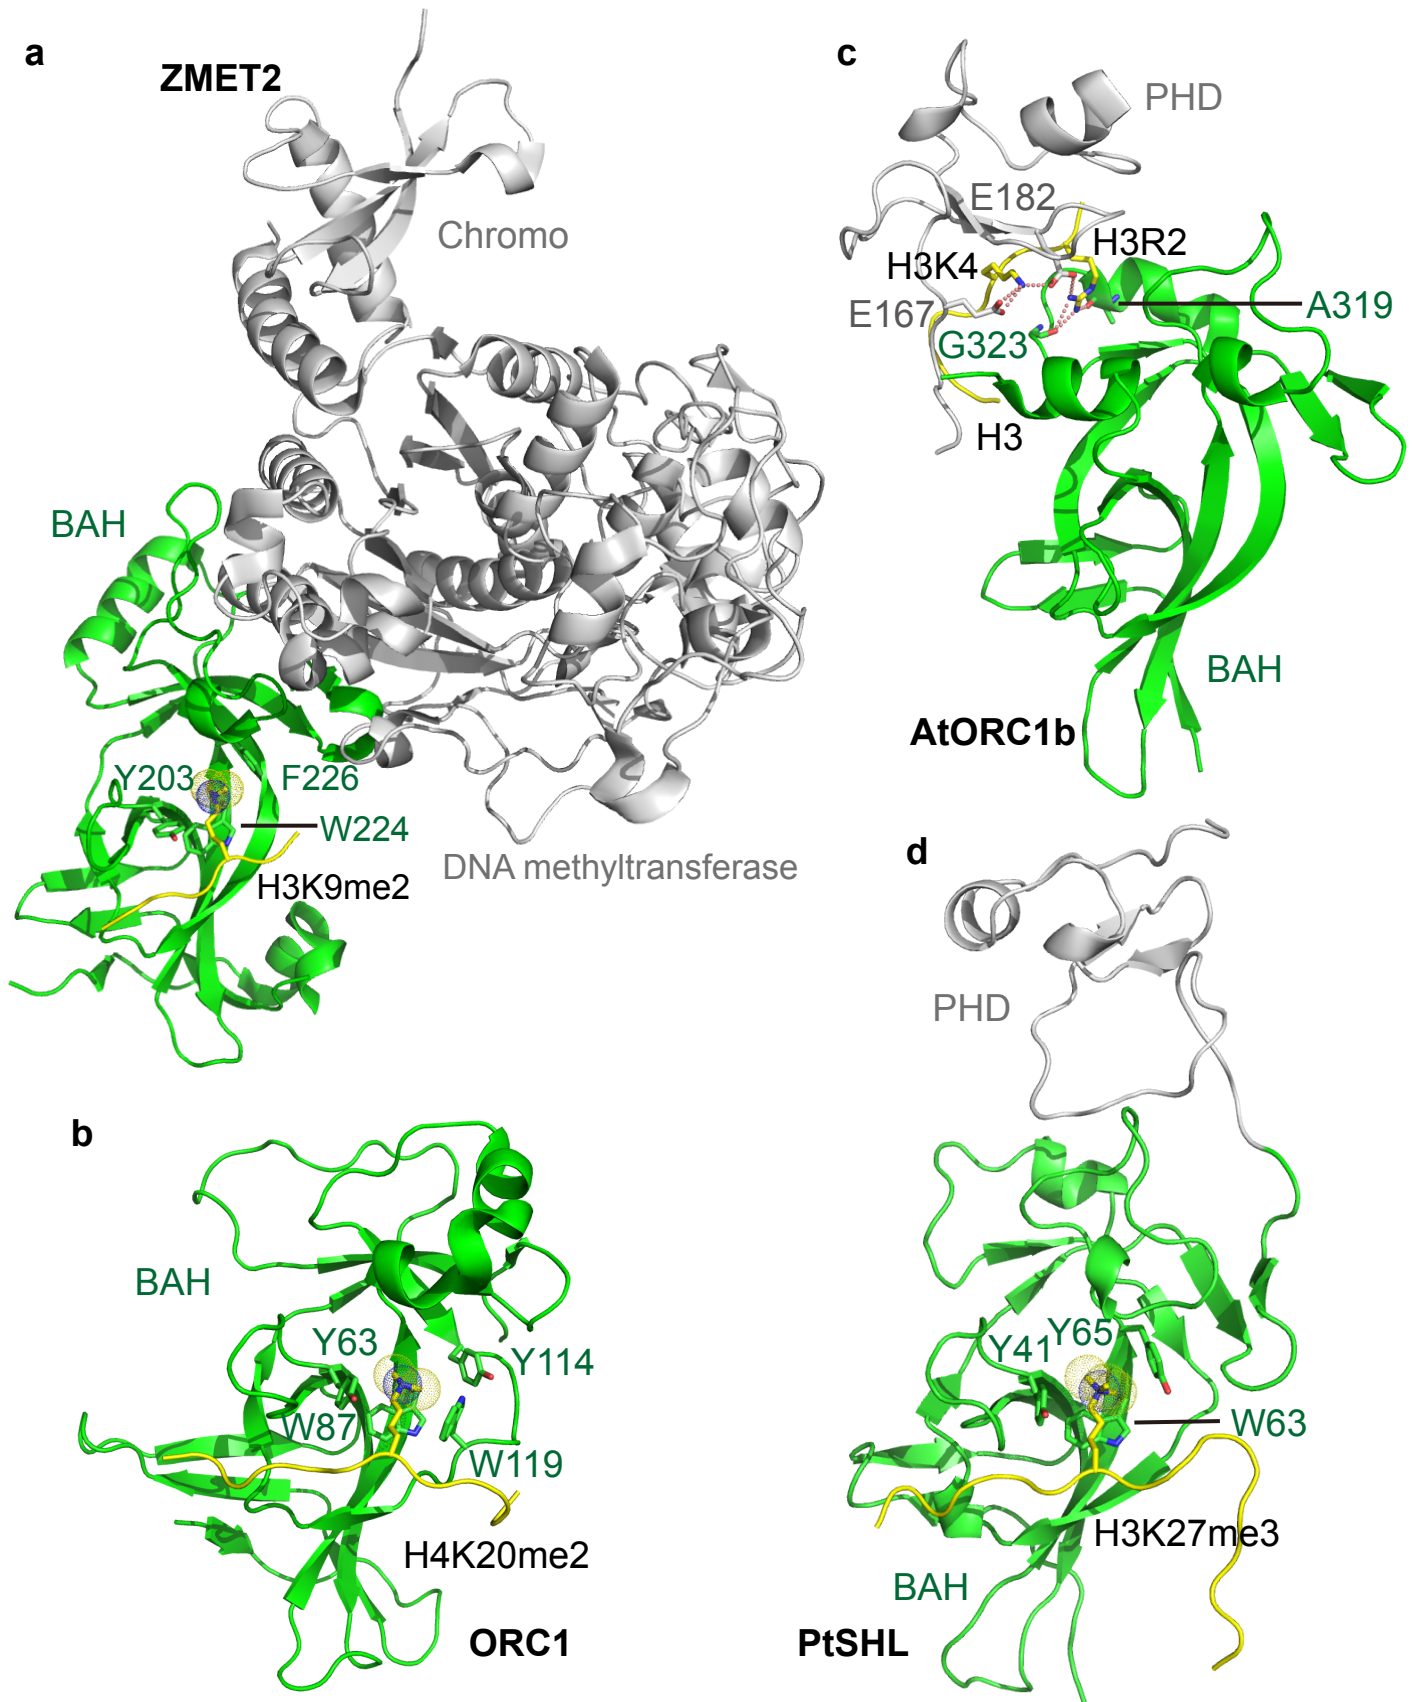

**Supplementary Fig. 5** The comparison of the BAH-histone peptide recognition from different structures. (a-d) Structure of maize ZMET2-H3K9me2 complex (a, PDB code: 4FT4), mouse Orc1 BAH-H4K20me2 complex (b, PDB code: 4DOW), Arabidopsis ORC1b BAH-PHD-H3(1-15) complex (c, PDB code: 5HH7), and PtSHL-H3K27me3 complex (d). The BAH domains and the remaining parts of the proteins are colored in green and silver, respectively. The peptide is shown in space-filling representation. The BAH domains are aligned to the same orientation.

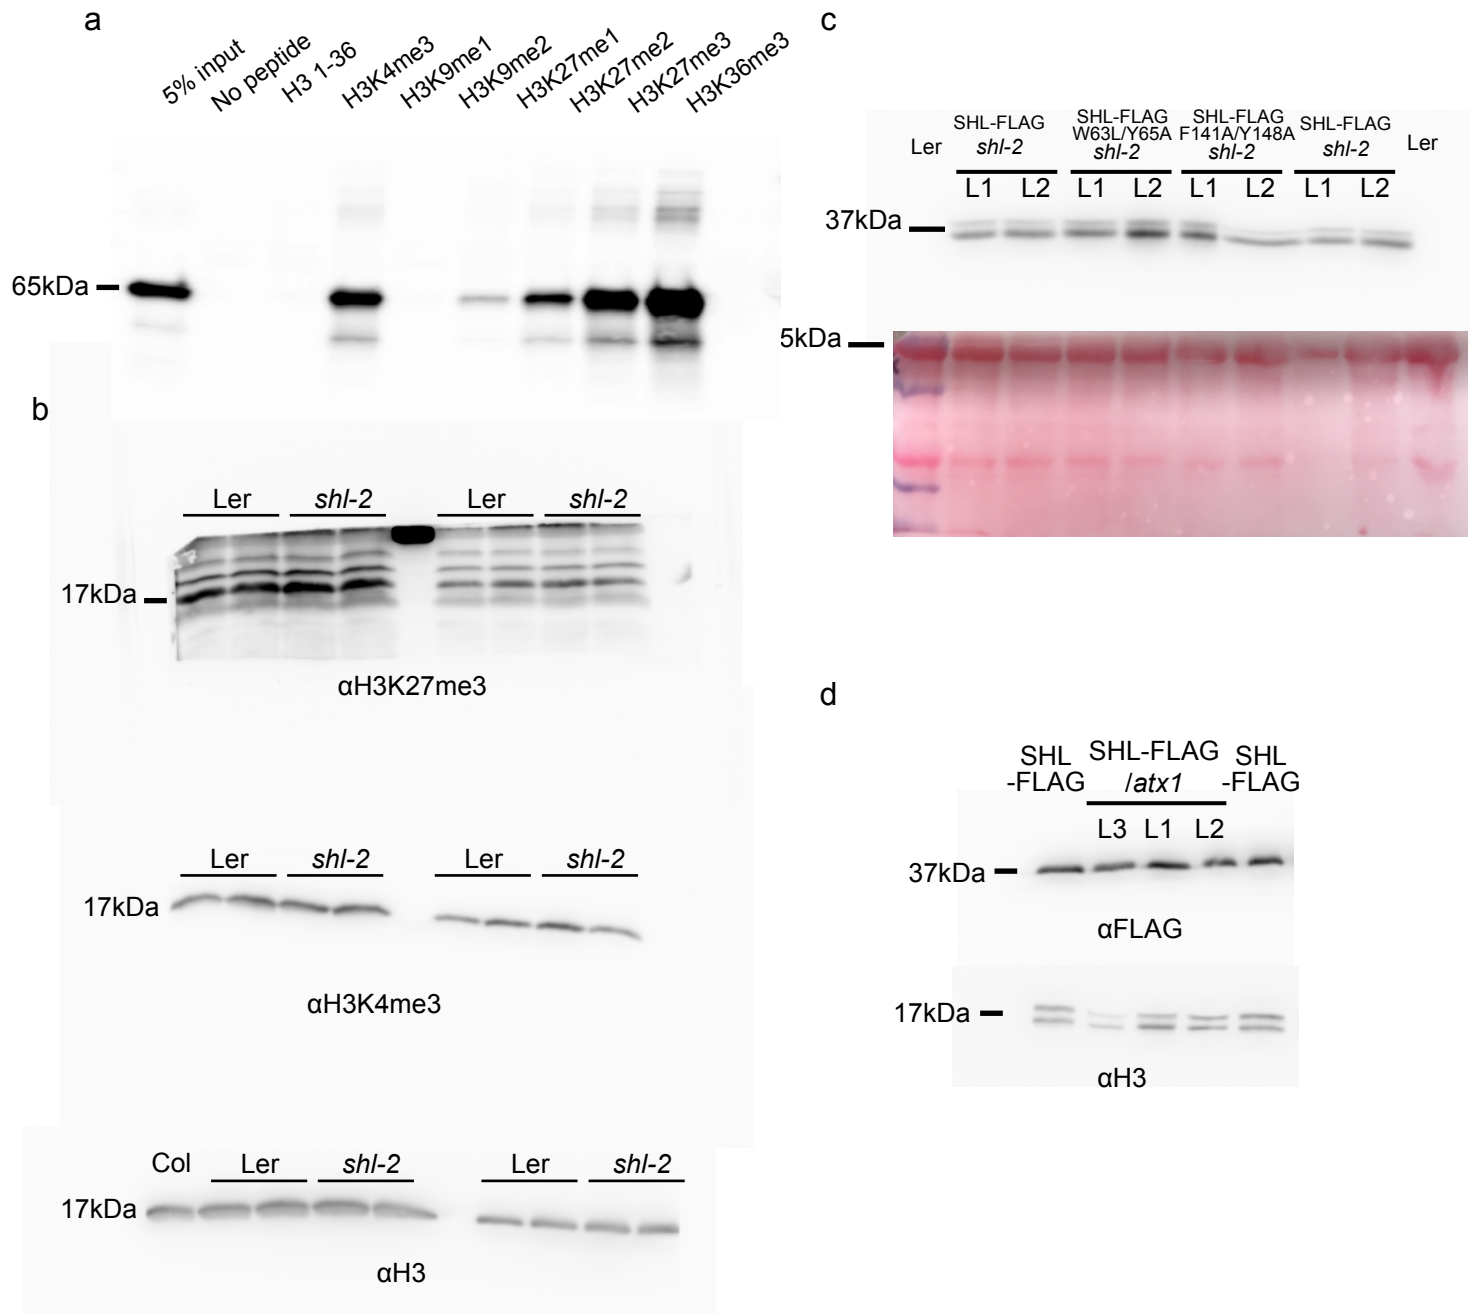

**Supplementary Fig. 6 Raw images of western blots in this study**

(a) Raw images of GST western blot in Fig. 1C. (b) Raw image of western blot of H3K4me3, H3K27me3 and H3 in Supplementary Fig. 4a. (c) Raw images of FLAG western blots in Supplementary Fig. 4b.(d) Raw images of FLAG western blot in Supplementary Fig. 4c.

Supplementary Table 1 List of primers used in this study

| Name   | Primer sequences                                   | Used for                |
|--------|----------------------------------------------------|-------------------------|
| ZP89   | caccggatttcattgattatgattgttg                       | Cloning to entry vector |
| ZP90   | acctggtcgcttagtggtttgttcttc                        | Cloning to entry vector |
| ZP57   | tgttgaaatcccttcgaatg                               | Genotype                |
| ZP58   | tcatctgggttatacggcatc                              | Genotype                |
| ZP105  | cctggaaaaccgtcggcggtagcagggttagag                  | Y41A                    |
| ZP106  | ctctaccctcgctaccgccgacggtttccagg                   | Y41A                    |
| ZP107  | gaaagttcgtgtgaggctgtatgcgcgcctgaggaatctatc         | W63L/Y65A               |
| ZP108  | gatagattcctcaggcgcgcatacagcctcacacgaacttc          | W63L/Y65A               |
| ZP1396 | ctgtttgcaggttctgcaagtgtgagatgccgtataaccagatgacttg  | F141A/Y148A             |
| ZP1397 | caagtcactctgggttatacggcatctcacactgcagaacctgcaaacag | F141A/Y148A             |
| ZP98   | ccgtactccgcgagacatgc                               | sequencing              |
| ZP20   | ggcgtctcgcatatctcattaaagc                          | sequencing              |
| ZP98   | ccgtactccgcgagacatgc                               | sequencing              |
| ZP22   | ggcgtctcgcatatctcattaaagc                          | sequencing              |
| ZP887  | gaagaagatatggtgagggggc                             | ChIP-qPCR for SOC1      |
| ZP1009 | cagcatcacaagcactgag                                | ChIP-qPCR for SOC1      |
| ZP230  | cgacaagtcaccttctccaaa                              | ChIP-qPCR for FLC       |
| ZP231  | agggggaacaaatgaaaacc                               | ChIP-qPCR for FLC       |
| ZP1679 | cgaagatctcactggcaaatc                              | ChIP-qPCR for NGA       |
| ZP1680 | gaatctccgacacatctttgg                              | ChIP-qPCR for NGA       |
| ZP7    | cgtttcgttcttagtgtagct                              | ChIP-qPCR for Actin7    |
| ZP8    | agcgaacggatctagactcaccttg                          | ChIP-qPCR for Actin7    |
| ZP1297 | ctggtcggattaaccagggtg                              | ChIP-qPCR for EMF1      |
| ZP1298 | ggaagatagacgtataaatgaacag                          | ChIP-qPCR for EMF1      |
| PtSHL  | cgggatccatggcaaaagcgaagcgcgcgc                     | Cloning PtSHL           |
| PtSHL  | gcggcgcgcggcgcttctcgttttccat                       | Cloning PtSHL           |
| AtSHL  | cgggatccatgcccaagcaaaaagctccaagg                   | Cloning AtSHL           |
| AtSHI  | gcggcgcctaacctggctgcttagtggttg                     | Cloning AtSHL           |
| W163A  | cagcgatgcgttcaccgg                                 | PtSHL W163A             |
| W163A  | gtggaacgcatcgctgcaacc                              | PtSHL W163A             |
| Y141A  | cgtgttgcggttgctgtaaagcgc                           | PtSHL Y141A             |
| Y141A  | cgcatttacaggcaaccgcaacacg                          | PtSHL Y141A             |
| Y148A  | gcgaaatgccggccaaccgggatg                           | PtSHL Y148A             |
| Y148A  | catccgggttgccggcatttcgc                            | PtSHL Y148A             |
| M154A  | ggatgatctggcggtcagtgcggaag                         | PtSHL M154A             |
| M154A  | gcactgaaccgccagatcatccggg                          | PtSHL M154A             |
| Q156A  | gatggttgctgcgaaggttgc                              | PtSHL Q156A             |
| Q156A  | ccttcgacgcaaccatcagatc                             | PtSHL Q156A             |
| W63A   | gttcgtgcgtactatcgccggaag                           | PtSHL W63A              |
| W63A   | gatagtacgcacgaacacgaacacg                          | PtSHL W63A              |
| Y41A   | ccgagcgccttgctaaaatcgaaac                          | PtSHL Y41A              |
| Y41A   | gattttagcaacggcgcctcggttag                         | PtSHL Y41A              |
| Y65A   | gttggtacgctcgtccggaagaatc                          | PtSHL Y65A              |
| Y65A   | ccggacgagcgtaccaacgaacacg                          | PtSHL Y65A              |

---

|      |                                |            |
|------|--------------------------------|------------|
| H88A | gtccgatgcctatgataccagtc        | PtSHL H88A |
| H88A | gggtatcatagggatcggacagaaaac    | PtSHL H88A |
| D90A | ccgatcactatgccaccagctgcgg      | PtSHL D90A |
| D90A | gcagactgggtggcatagtgatcggacagg | PtSHL D90A |

---



Supplementary Table 2. Read numbers for CHIP-seq experiments

| <b>Sample name</b> | <b>Total raw reads<br/>(50bp length)</b> | <b>Reads mapped to<br/>genome</b> | <b>Unique mapped<br/>reads</b> |
|--------------------|------------------------------------------|-----------------------------------|--------------------------------|
| Col-0              | 9,412,540                                | 8,939,183                         | 6,392,775                      |
| SHL-FLAG           | 10,078,136                               | 9,848,692                         | 7,369,668                      |
